# Supplementary material for: Hybrid flavan–flavanones from Friesodielsia desmoides and their inhibitory activities against nitric oxide production
Source: Royal Society of Chemistry journal article supplement (doi:10.1039/c7ra02528a), 2017-01-01
Supplement: c7ra02528a1.pdf [file c7ra02528a1.pdf]

## Supporting information

### Hybrid flavan-flavanones from *Friesodielsia desmoides* and their inhibitory activities against nitric oxide production

Pornphimol Meesakul,<sup>a</sup> Khanitha Pudhom,<sup>b</sup> Stephen G. Pyne,<sup>c</sup> Surat Laphookhieo<sup>\*,a</sup>

<sup>a</sup>Natural Products Research Laboratory, School of Science, Mae Fah Luang University, Chiang Rai, 57100, Thailand

<sup>b</sup>Department of Chemistry, Faculty of Science, Chulalongkorn University, Bangkok, 10330 Thailand

<sup>c</sup>School of Chemistry, University of Wollongong, Wollongong, New South Wales, 2522 Australia

Corresponding Author E-mail: [surat.lap@mfu.ac.th](mailto:surat.lap@mfu.ac.th)

## Contents

|                                                                                                                             |    |
|-----------------------------------------------------------------------------------------------------------------------------|----|
| <b>Figure S1.</b> $^1\text{H}$ NMR (400 MHz, acetone- $d_6$ ) spectrum of compound <b>1</b>                                 | 3  |
| <b>Figure S2.</b> $^{13}\text{C}$ NMR (100 MHz, acetone- $d_6$ ) spectrum of compound <b>1</b>                              | 3  |
| <b>Figure S3.</b> COSY NMR spectrum (acetone- $d_6$ ) of compound <b>1</b>                                                  | 4  |
| <b>Figure S4.</b> HMQC NMR spectrum (acetone- $d_6$ ) of compound <b>1</b>                                                  | 4  |
| <b>Figure S5.</b> HMBC NMR spectrum (acetone- $d_6$ ) of compound <b>1</b>                                                  | 5  |
| <b>Figure S6.</b> NOESY spectrum (acetone- $d_6$ ) of compound <b>1</b>                                                     | 5  |
| <b>Figure S7.</b> HRESIMS spectrum of compound <b>1</b>                                                                     | 6  |
| <b>Figure S8.</b> $^1\text{H}$ NMR (400 MHz, acetone- $d_6$ ) spectrum of compound <b>2</b>                                 | 6  |
| <b>Figure S9.</b> $^1\text{H}$ NMR (400 MHz, acetone- $d_6$ ) spectrum of compound <b>2</b>                                 | 7  |
| <b>S10.</b> Comparison of $^1\text{H}$ NMR spectrum (400 MHz) of compound <b>2</b><br>in methanol- $d_4$ and acetone- $d_6$ | 7  |
| <b>Figure S11.</b> $^{13}\text{C}$ NMR (100 MHz, acetone- $d_6$ ) spectrum of compound <b>2</b>                             | 8  |
| <b>Figure S12.</b> COSY NMR spectrum (acetone- $d_6$ ) of compound <b>2</b>                                                 | 8  |
| <b>Figure S13.</b> HMQC NMR spectrum (acetone- $d_6$ ) of compound <b>2</b>                                                 | 9  |
| <b>Figure S14.</b> HMBC NMR spectrum (acetone- $d_6$ ) of compound <b>2</b>                                                 | 9  |
| <b>Figure S15.</b> NOESY spectrum (acetone- $d_6$ ) of compound <b>2</b>                                                    | 10 |
| <b>Figure S16.</b> HRESIMS spectrum of compound <b>2</b>                                                                    | 10 |
| <b>Figure S17.</b> $^1\text{H}$ NMR (400 MHz, acetone- $d_6$ ) spectrum of compound <b>3</b>                                | 11 |
| <b>Figure S18.</b> $^{13}\text{C}$ NMR (100 MHz, acetone- $d_6$ ) spectrum of compound <b>3</b>                             | 11 |
| <b>Figure S19.</b> COSY NMR spectrum (acetone- $d_6$ ) of compound <b>3</b>                                                 | 12 |
| <b>Figure S20.</b> HMQC NMR spectrum (acetone- $d_6$ ) of compound <b>3</b>                                                 | 12 |
| <b>Figure S21.</b> HMBC NMR spectrum (acetone- $d_6$ ) of compound <b>3</b>                                                 | 13 |
| <b>Figure S22.</b> NOESY spectrum (acetone- $d_6$ ) of compound <b>3</b>                                                    | 13 |
| <b>Figure S23.</b> HRESIMS spectrum of compound <b>3</b>                                                                    | 14 |
| <b>Table S1.</b> $^1\text{H}$ , $^{13}\text{C}$ and HMBC NMR spectroscopic data of compound <b>1</b> in acetone- $d_6$      | 15 |
| <b>Table S2.</b> $^1\text{H}$ , $^{13}\text{C}$ and HMBC NMR data spectroscopic of compound <b>2</b> in acetone- $d_6$      | 16 |
| <b>Table S3.</b> $^1\text{H}$ , $^{13}\text{C}$ and HMBC NMR data spectroscopic of compound <b>3</b> in acetone- $d_6$      | 17 |

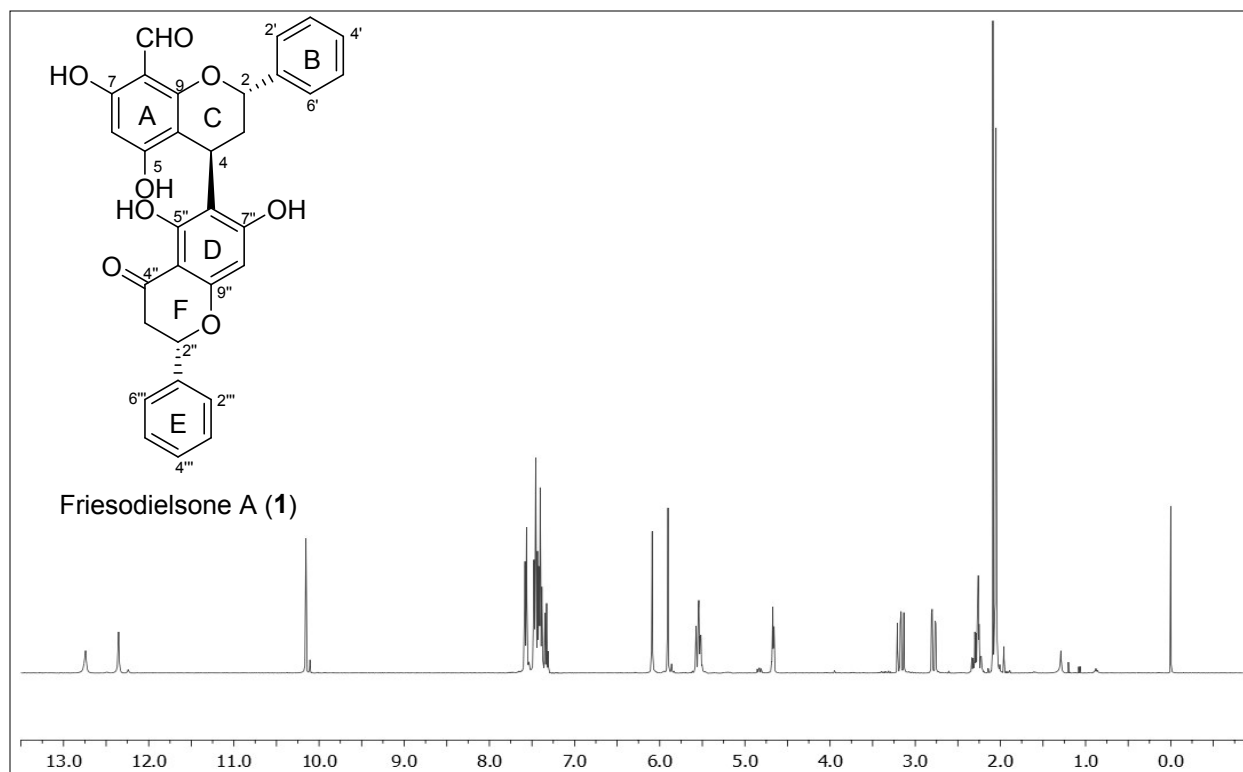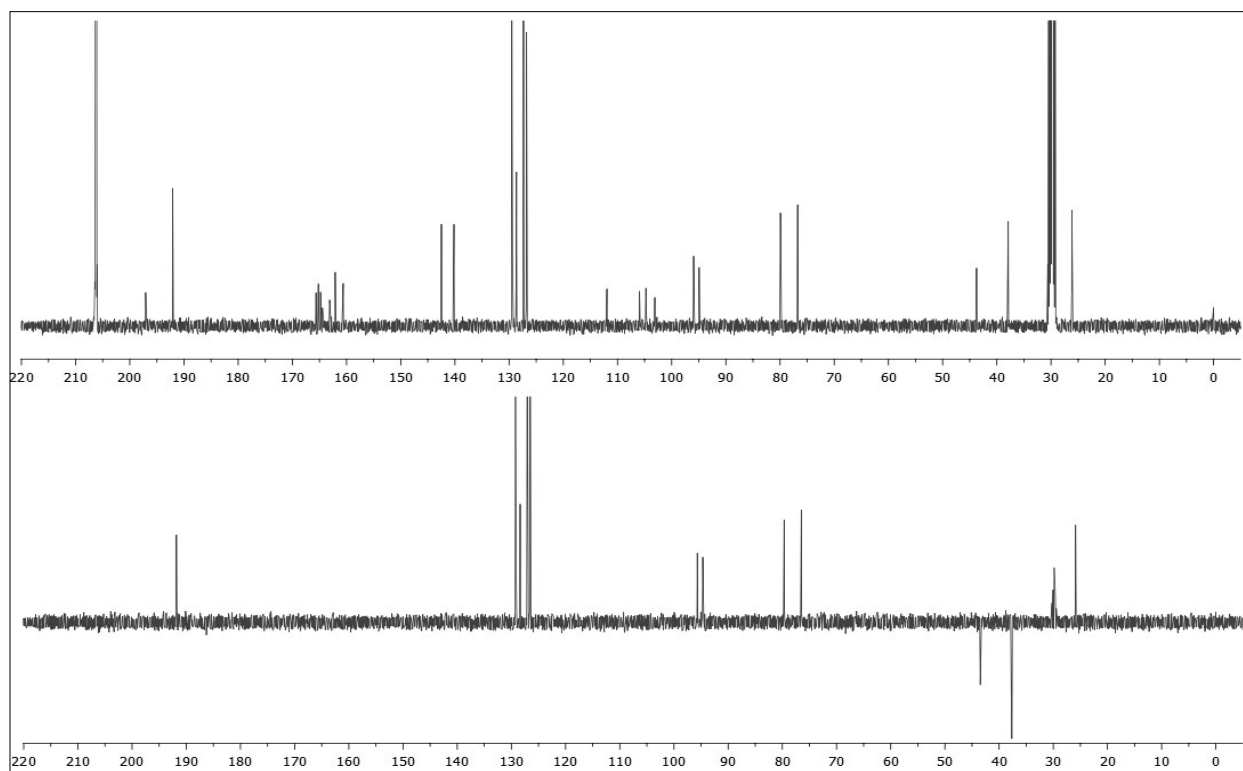

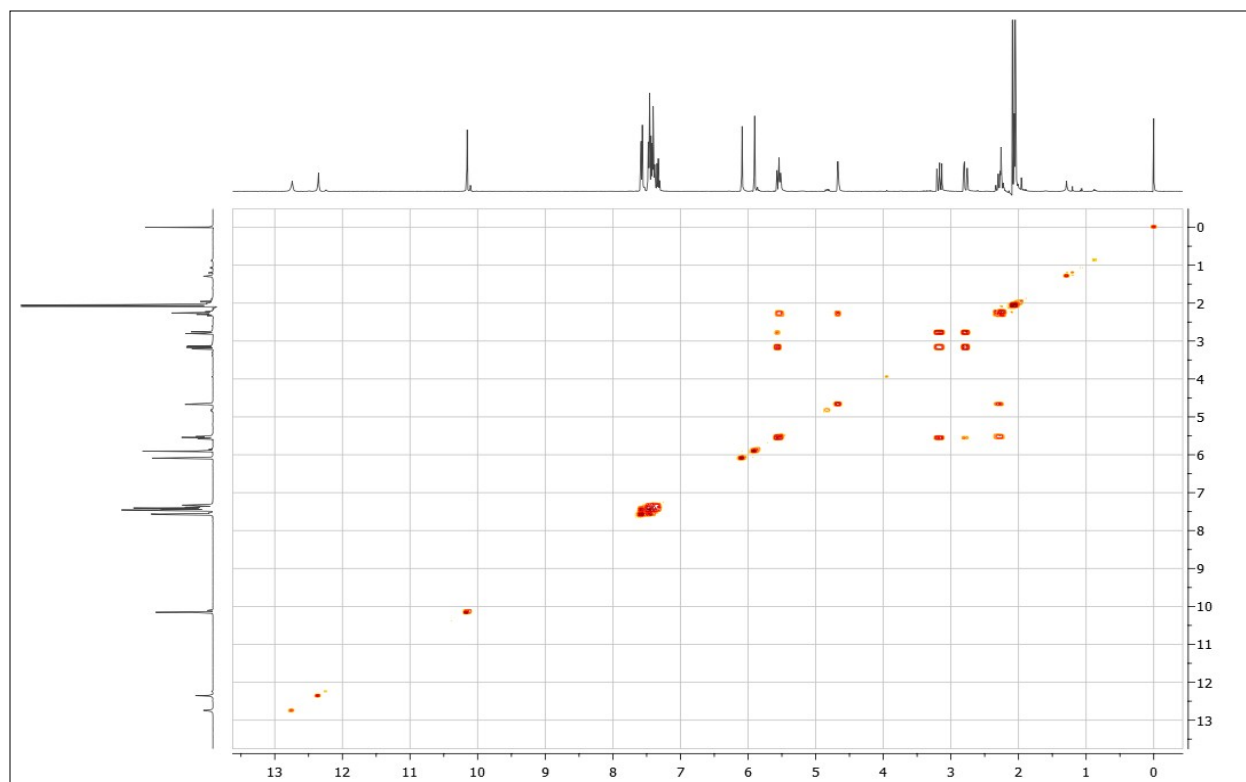

**S3.** COSY NMR spectrum (acetone- $d_6$ ) of compound **1**

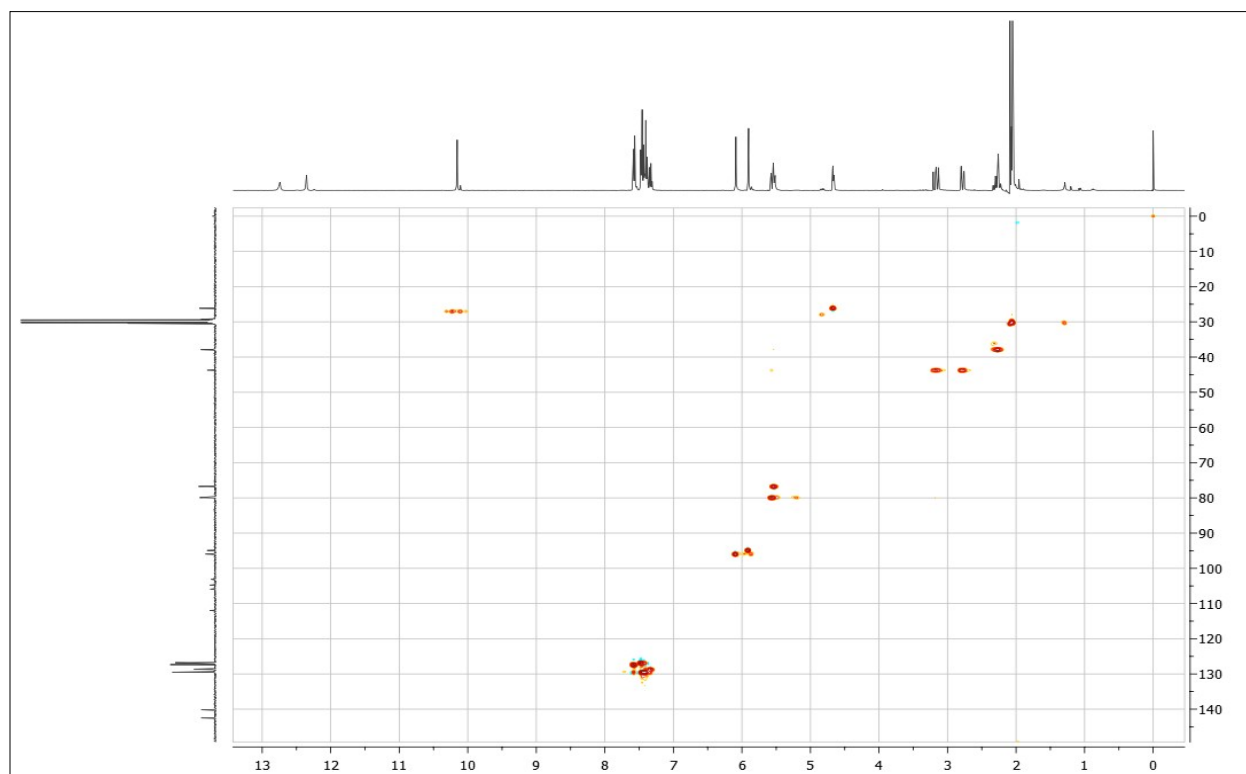

**S4.** HMQC NMR spectrum (acetone- $d_6$ ) of compound **1**

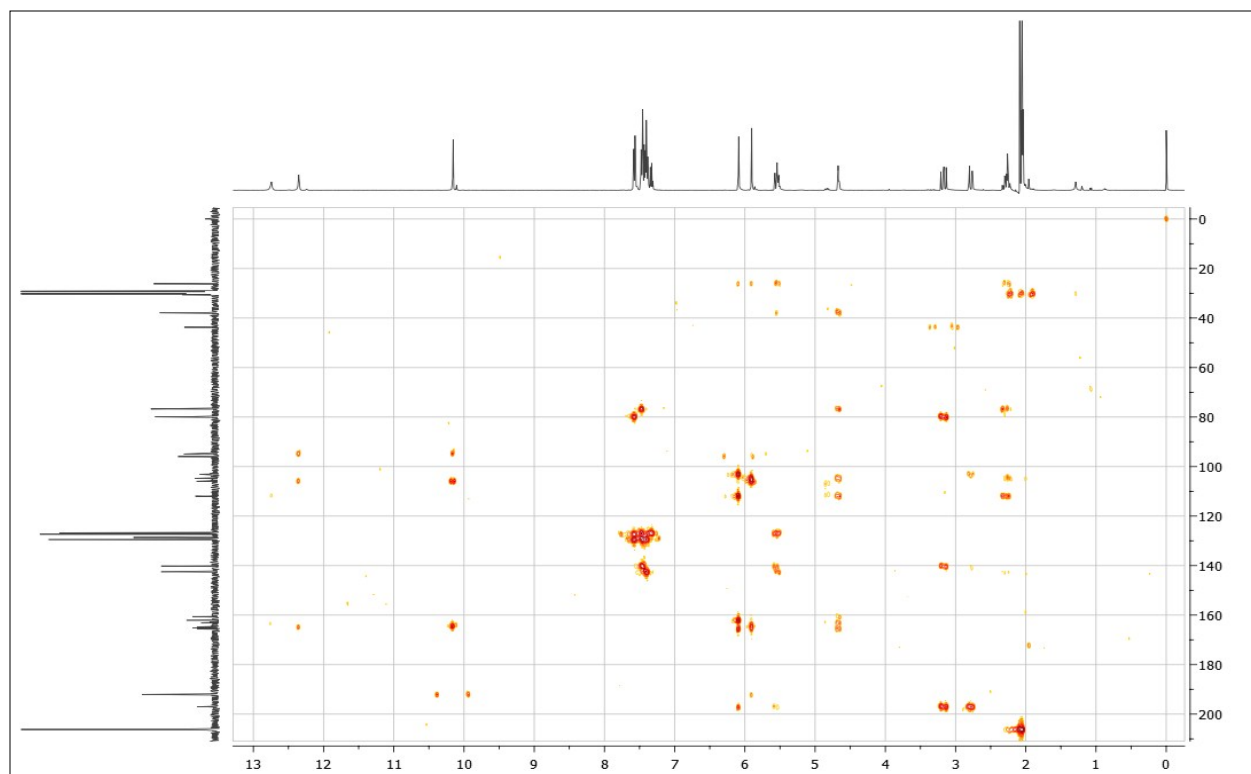

S5. HMBC NMR spectrum (acetone- $d_6$ ) of compound **1**

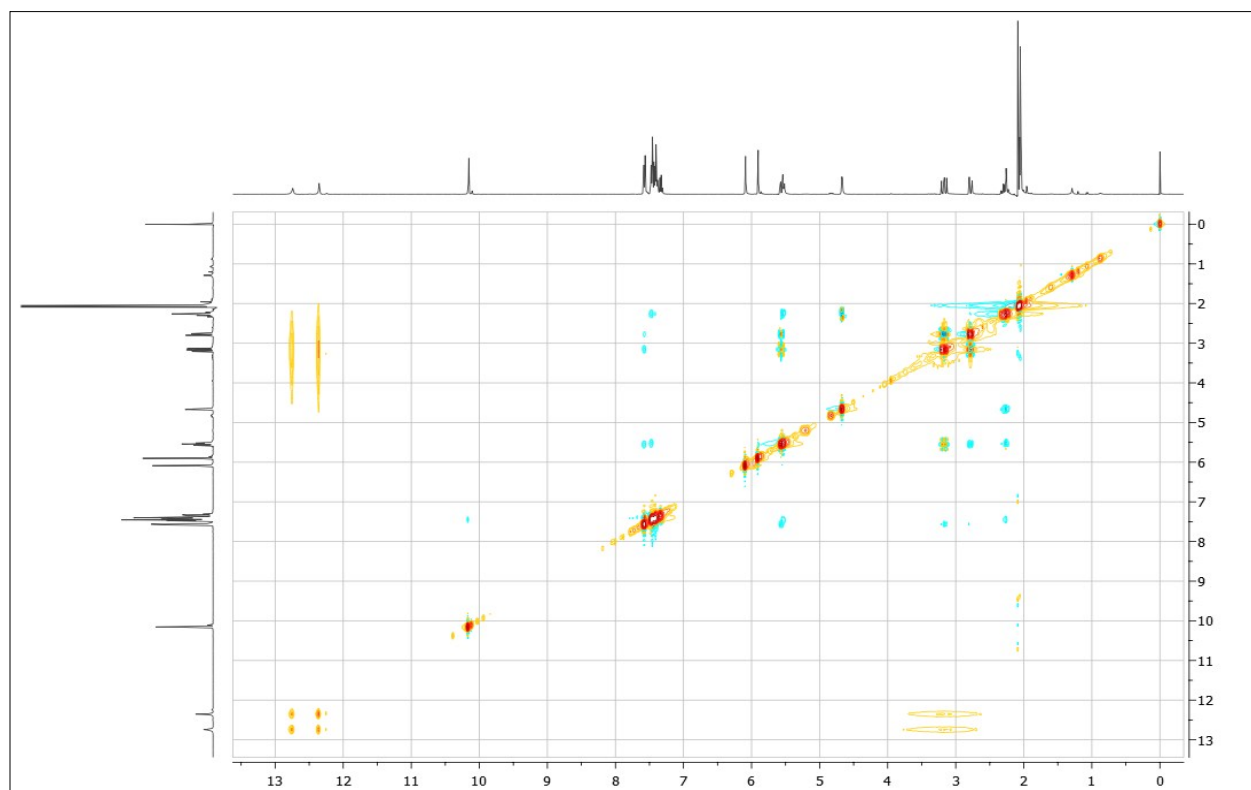

S6. NOESY spectrum (acetone- $d_6$ ) of compound **1**

Monoisotopic Mass, Even Electron Ions  
 133 formula(e) evaluated with 3 results within limits (up to 20 closest results for each mass)  
 Elements Used:  
 C: 0-40 H: 0-50 N: 0-2 O: 0-10  
 7EPK8B  
 SP SuratL 7EPK8B 49 (0.991) Cm (43:60)

1: TOF MS ES-  
 3.17e+003

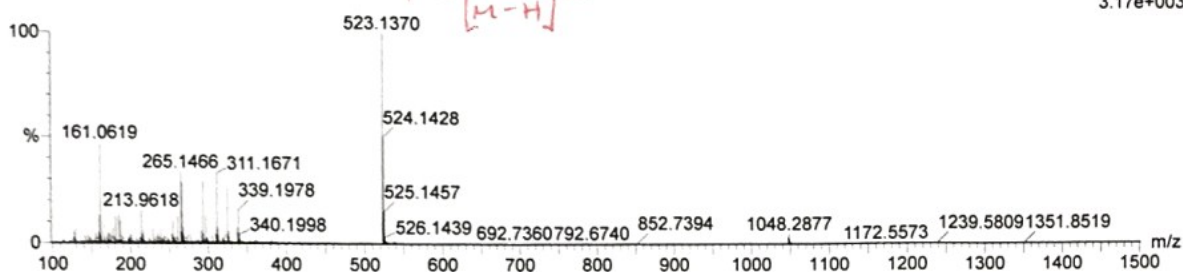

Minimum: -1.5  
 Maximum: 5.0 10.0 120.0

| Mass     | Calc. Mass | mDa  | PPM  | DBE  | i-FIT | i-FIT (Norm) | Formula        |
|----------|------------|------|------|------|-------|--------------|----------------|
| 523.1370 | 523.1353   | 1.7  | 3.2  | 16.5 | 174.4 | 3.0          | C26 H23 N2 O10 |
|          | 523.1393   | -2.3 | -4.4 | 20.5 | 172.5 | 1.1          | C31 H23 O8     |
|          | 523.1334   | 3.6  | 6.9  | 29.5 | 171.8 | 0.5          | C38 H19 O3     |

### S7. HRESIMS spectrum of compound 1

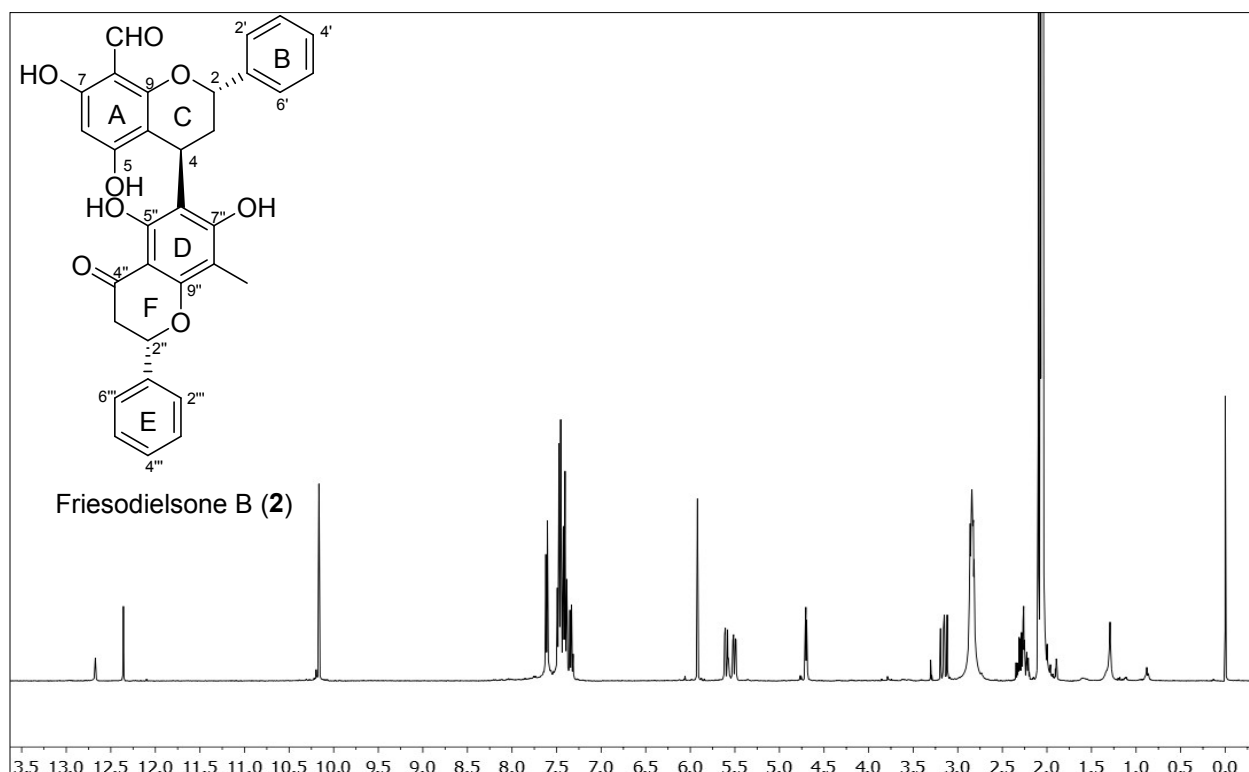

S8. <sup>1</sup>H NMR spectrum (400 MHz, acetone-*d*<sub>6</sub>) of compound 2

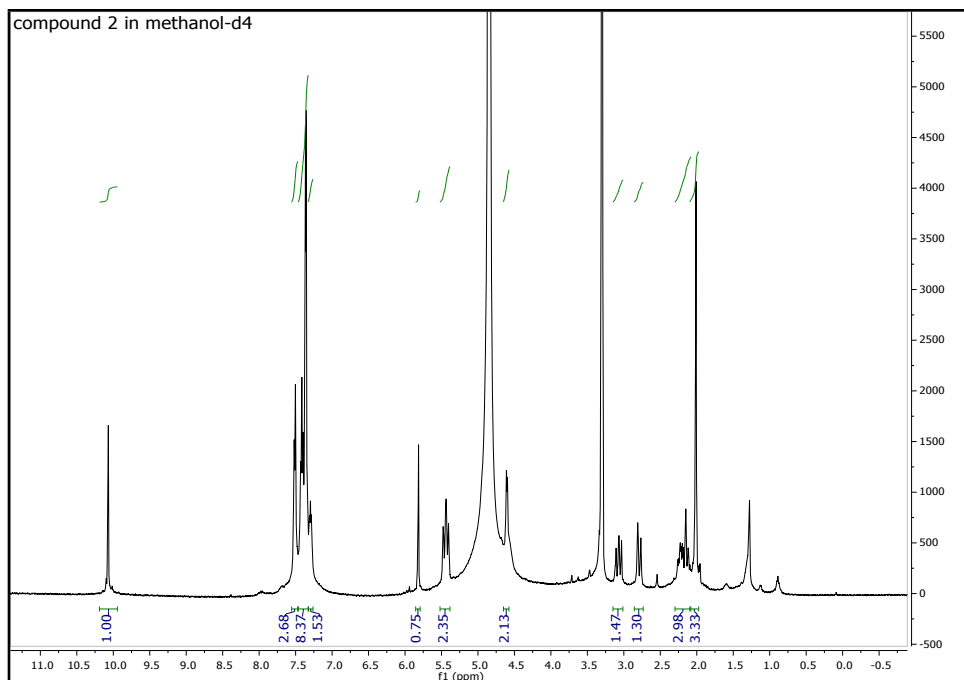

S9.  $^1\text{H}$  NMR spectrum (400 MHz, methanol- $d_4$ ) of compound 2

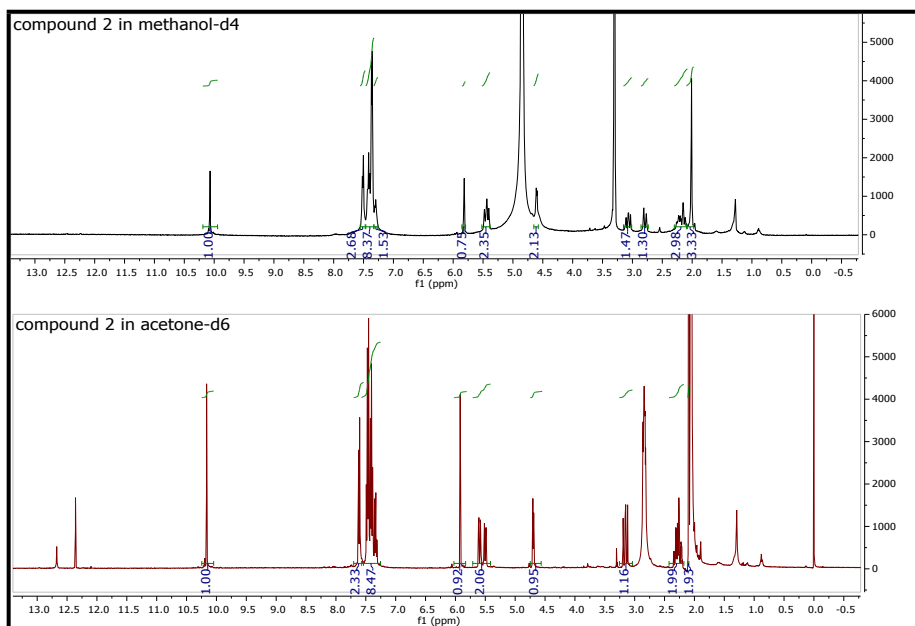

S10. Comparison of  $^1\text{H}$  NMR spectra of compound 2 (400 MHz) in methanol- $d_4$  and acetone- $d_6$

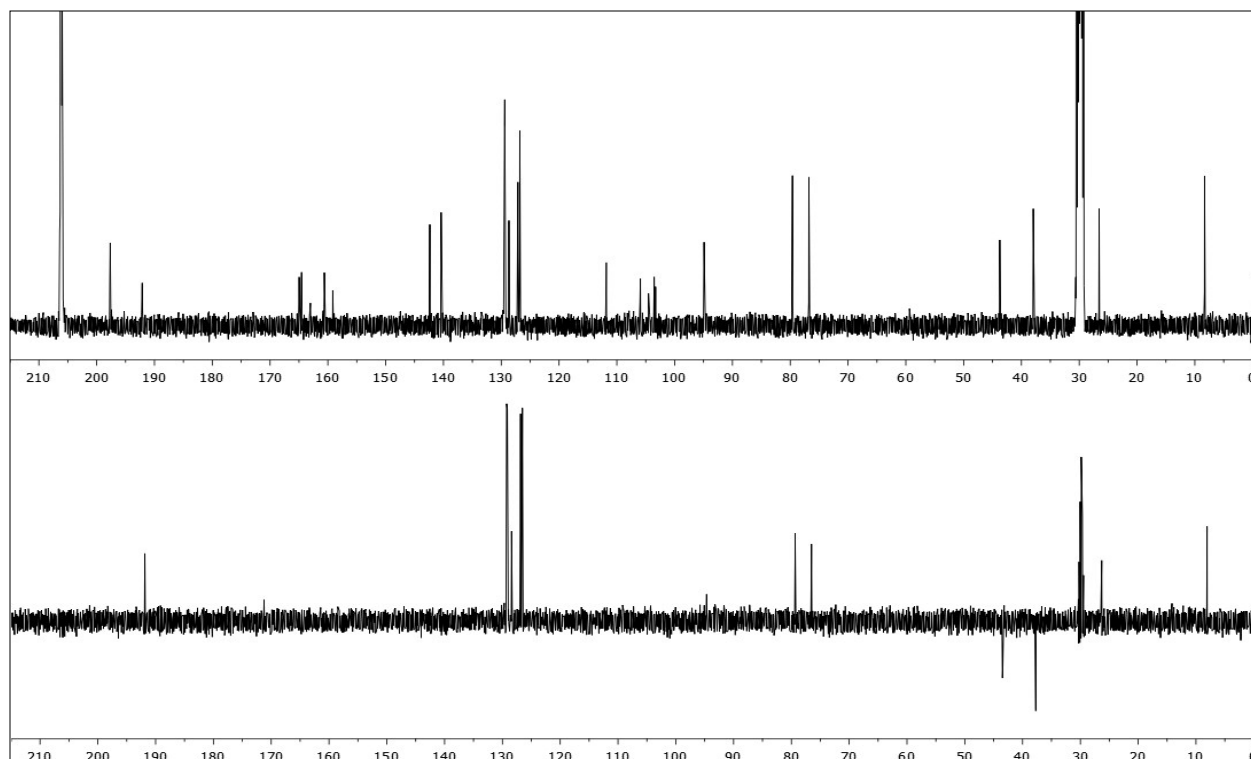

S11.  $^{13}\text{C}$  NMR spectrum (100 MHz, acetone- $d_6$ ) of compound 2

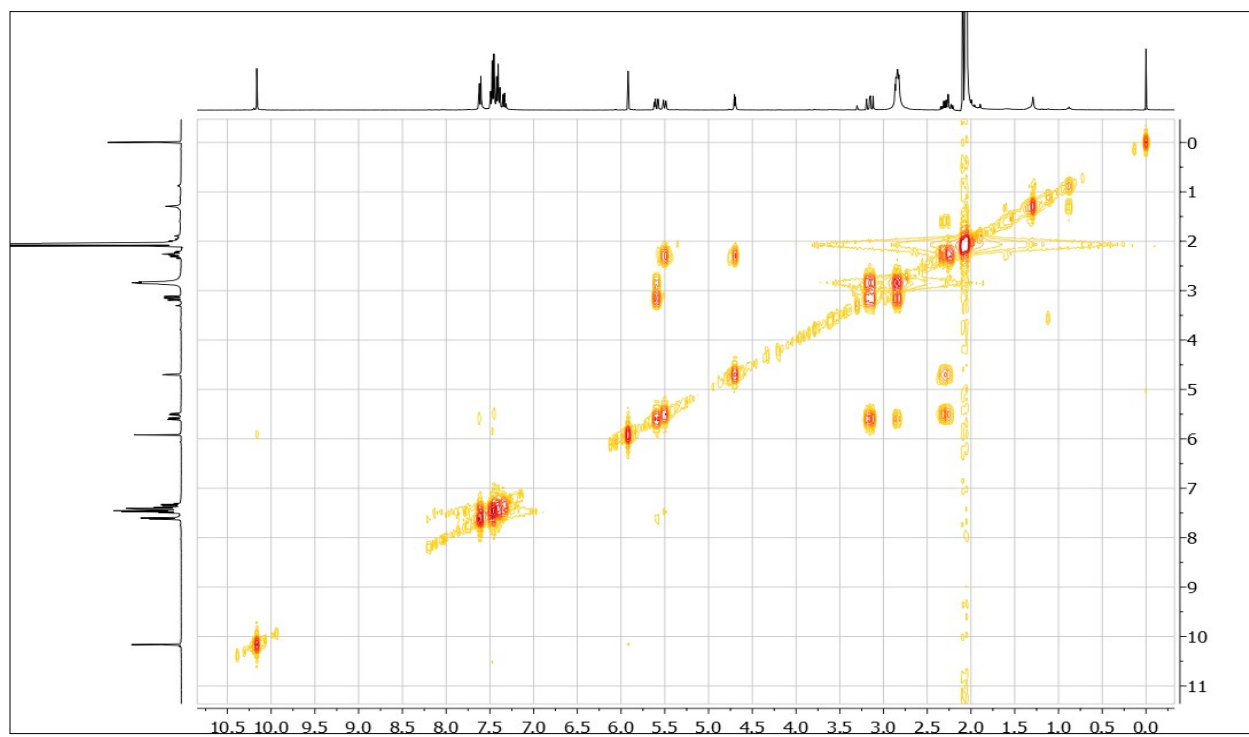

S12. COSY NMR spectrum (acetone- $d_6$ ) of compound 2



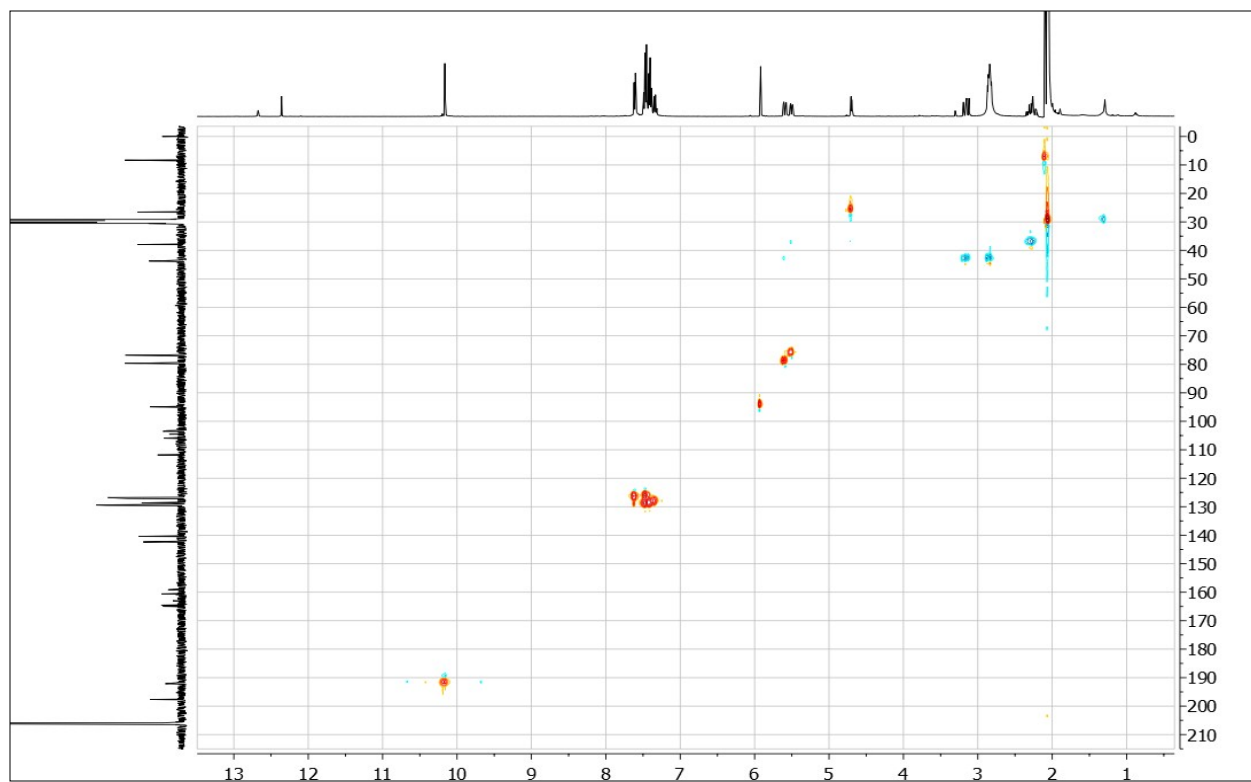

S13. HMQC NMR spectrum (acetone- $d_6$ ) of compound 2

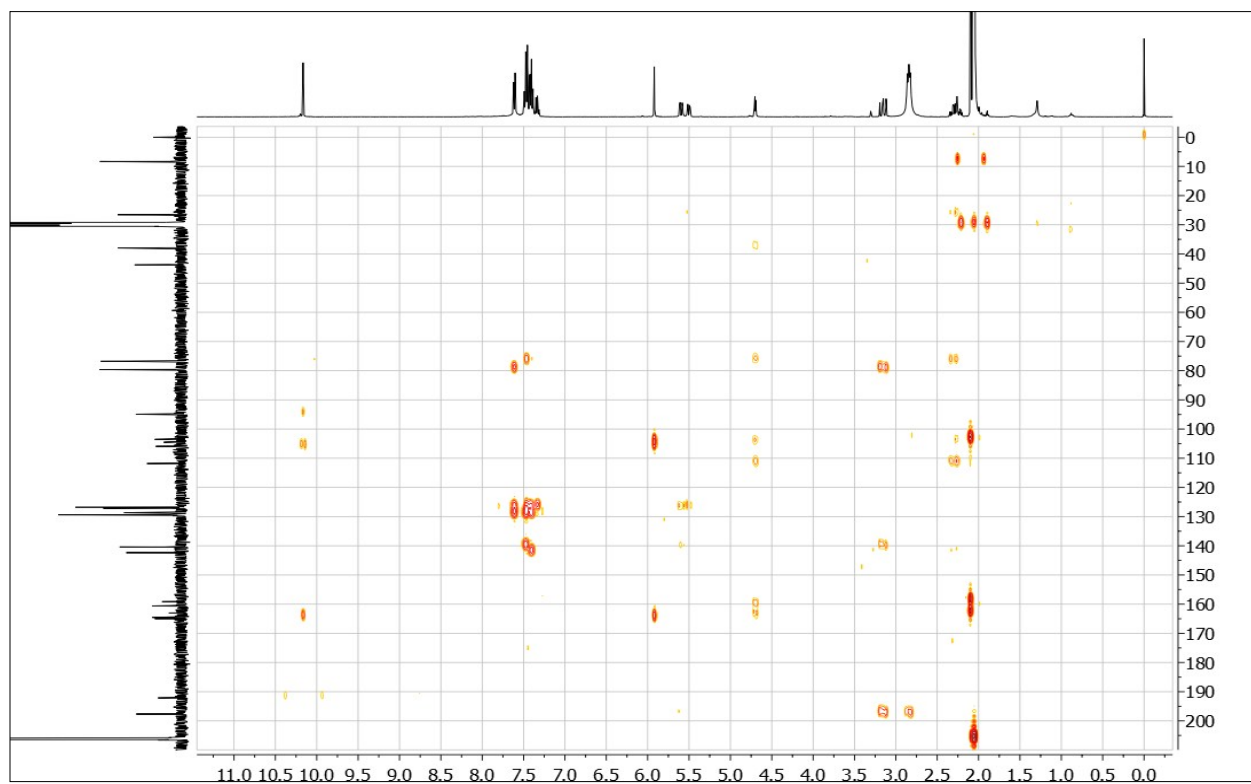

S14. HMBC NMR spectrum (acetone- $d_6$ ) of compound 2

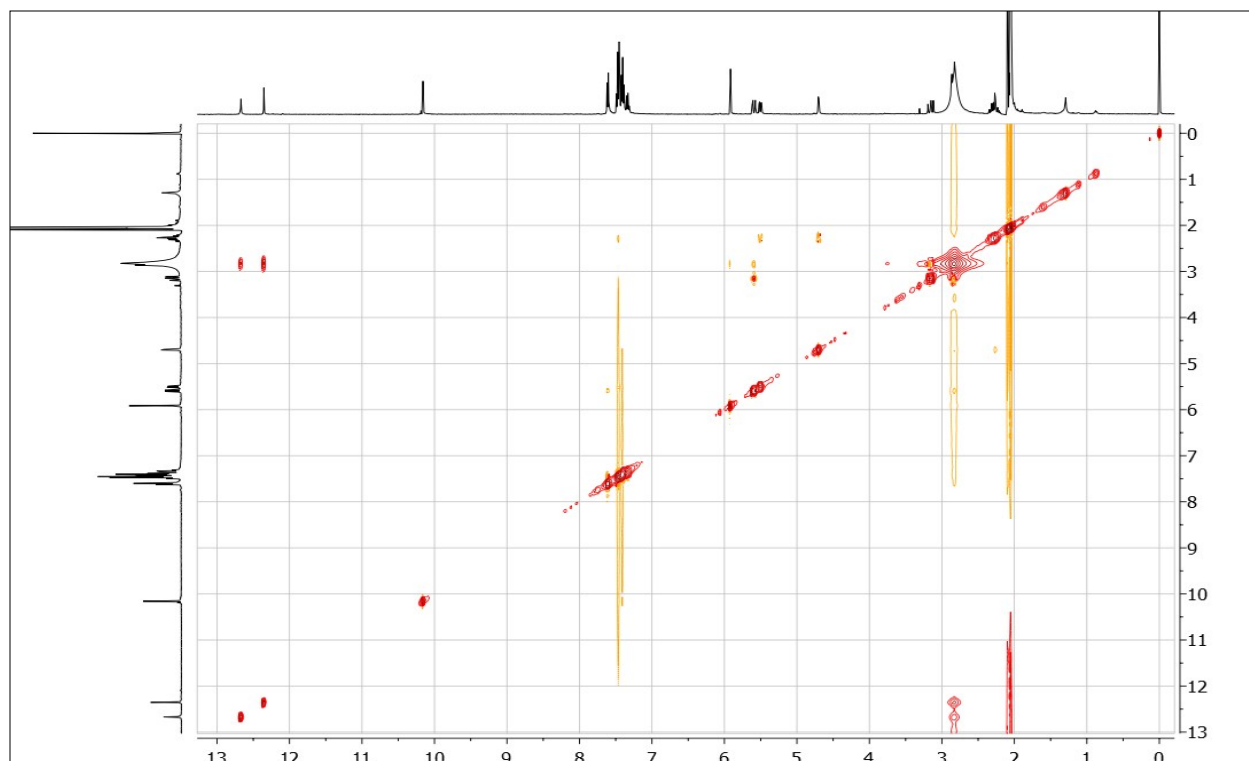

S15. NOESY spectrum (acetone- $d_6$ ) of compound 2

Monoisotopic Mass, Even Electron Ions  
 124 formula(e) evaluated with 3 results within limits (up to 20 closest results for each mass)  
 Elements Used:  
 C: 0-40 H: 0-50 N: 0-2 O: 0-10  
 7EPK8E  
 SP SuratL 7EPK8E 43 (0.869) Cm (43:48)

1: TOF MS ES-  
 3.13e+003

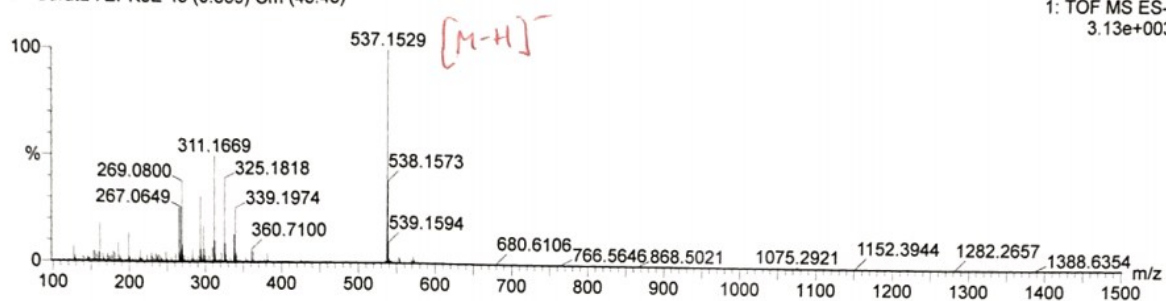

| Mass     | Calc. Mass | mDa  | PPM  | DBE  | i-FIT | i-FIT (Norm) | Formula        |
|----------|------------|------|------|------|-------|--------------|----------------|
| 537.1529 | 537.1509   | 2.0  | 3.7  | 16.5 | 145.2 | 3.8          | C27 H25 N2 O10 |
|          | 537.1549   | -2.0 | -3.7 | 20.5 | 141.5 | 0.1          | C32 H25 O8     |
|          | 537.1491   | 3.8  | 7.1  | 29.5 | 144.1 | 2.7          | C39 H21 O3     |

S16. HRESIMS spectrum of compound 2

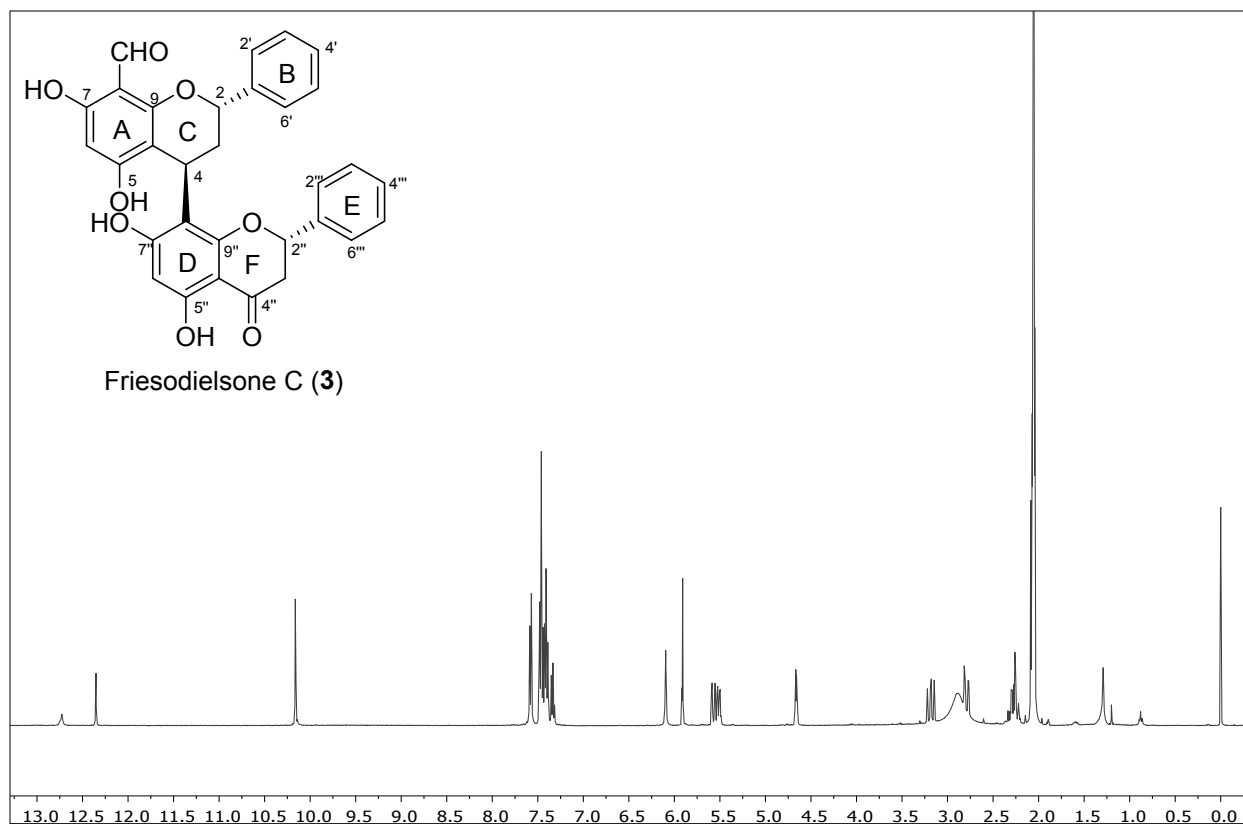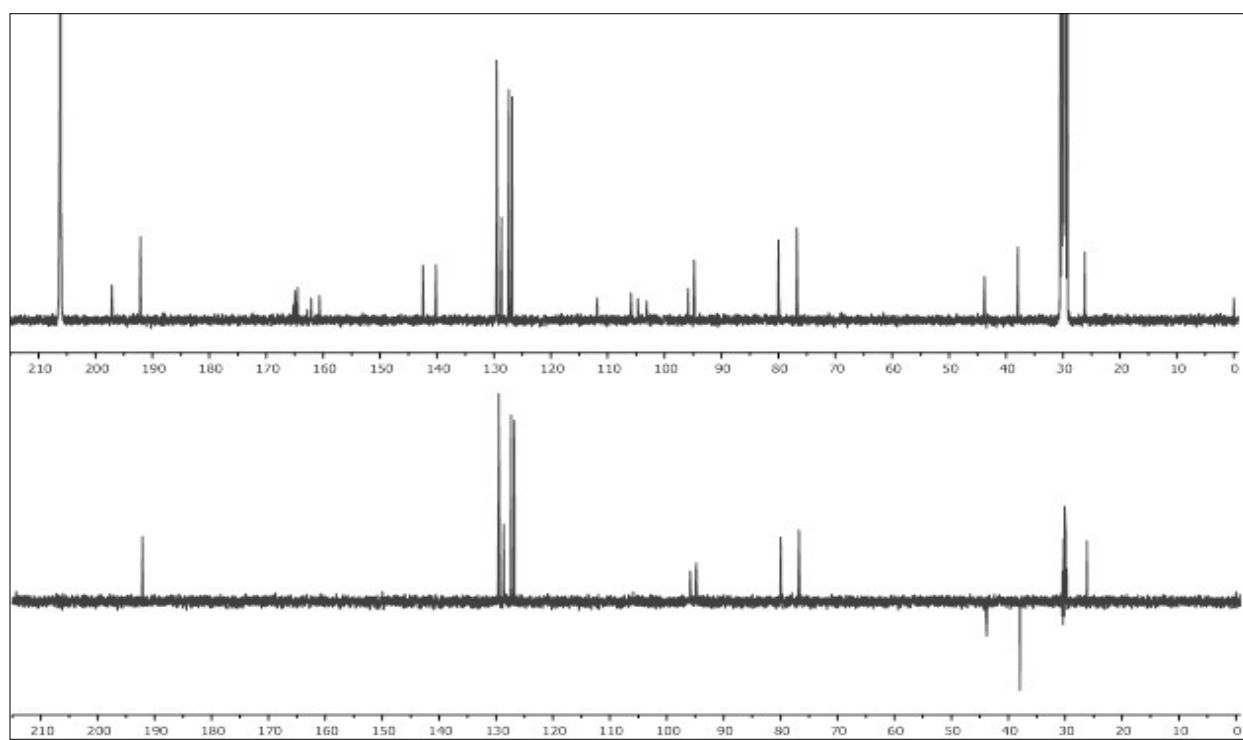

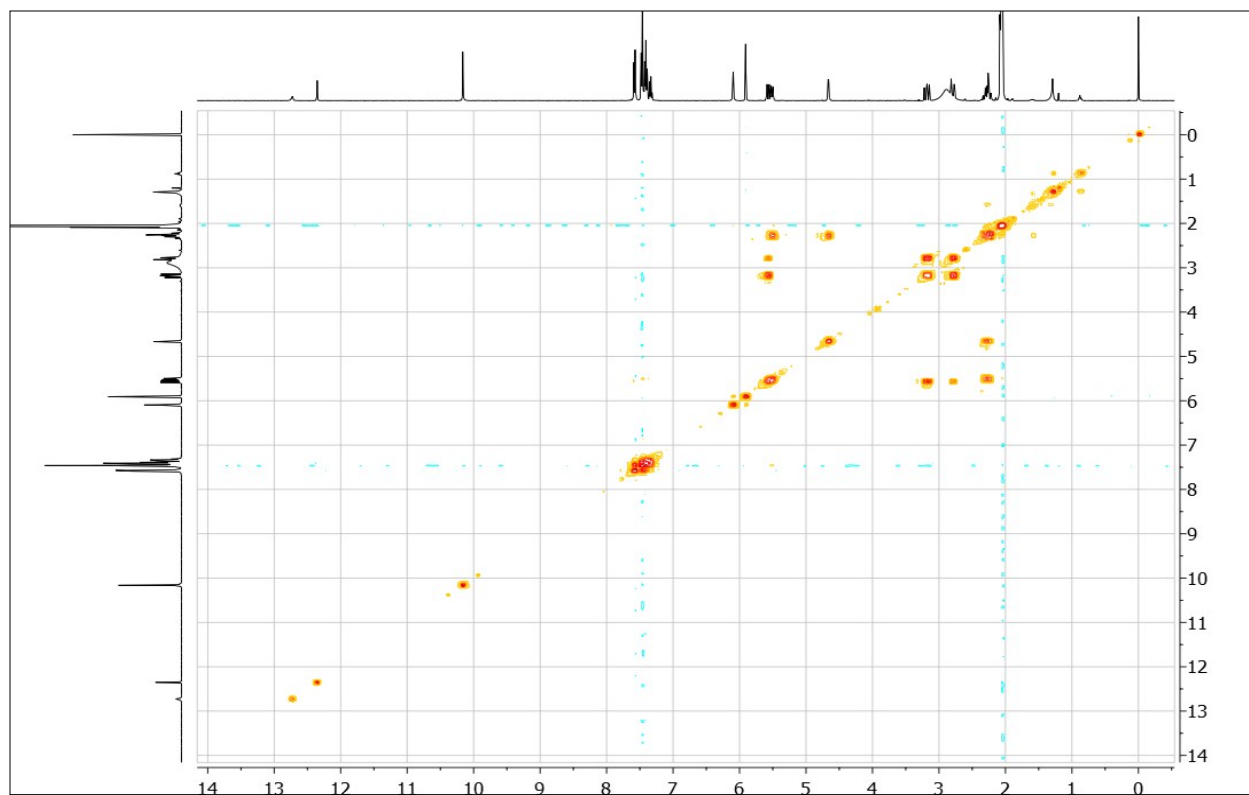

S19. COSY NMR spectrum (acetone- $d_6$ ) of compound **3**

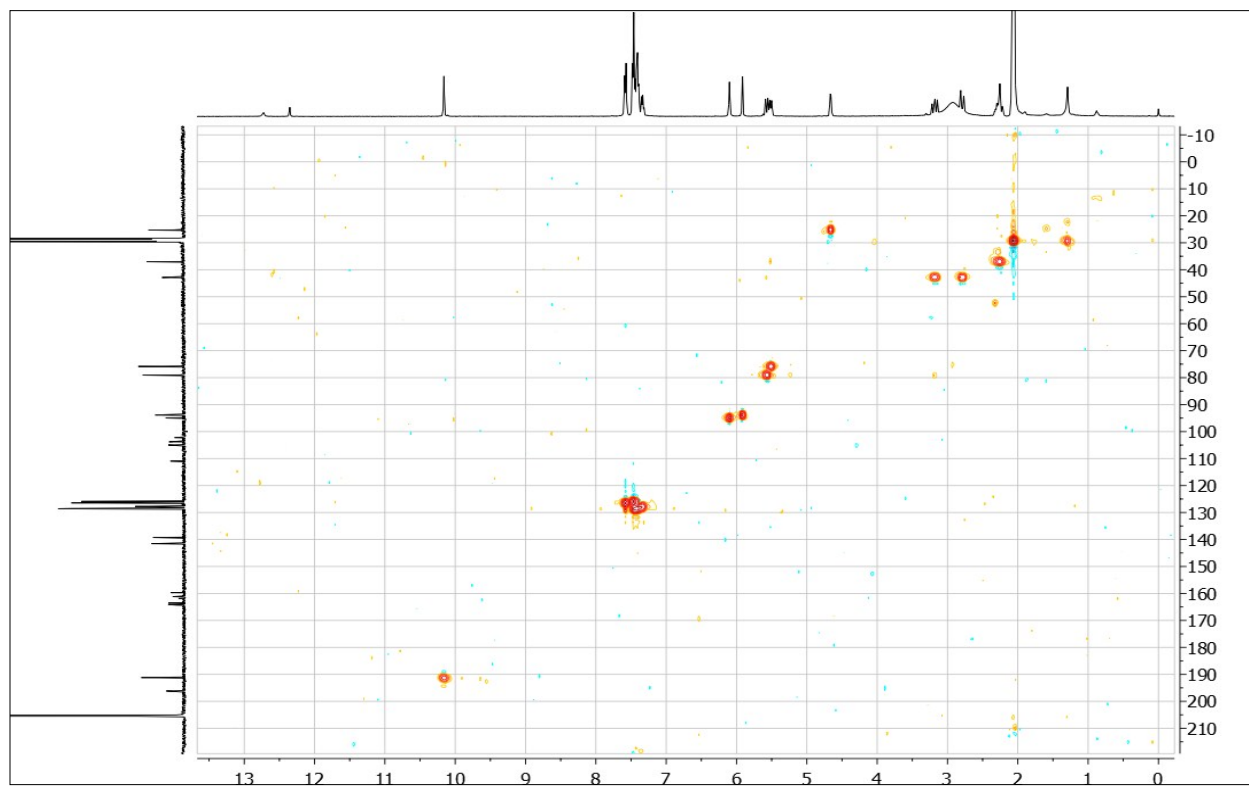

S20. HMQC NMR spectrum (acetone- $d_6$ ) of compound **3**

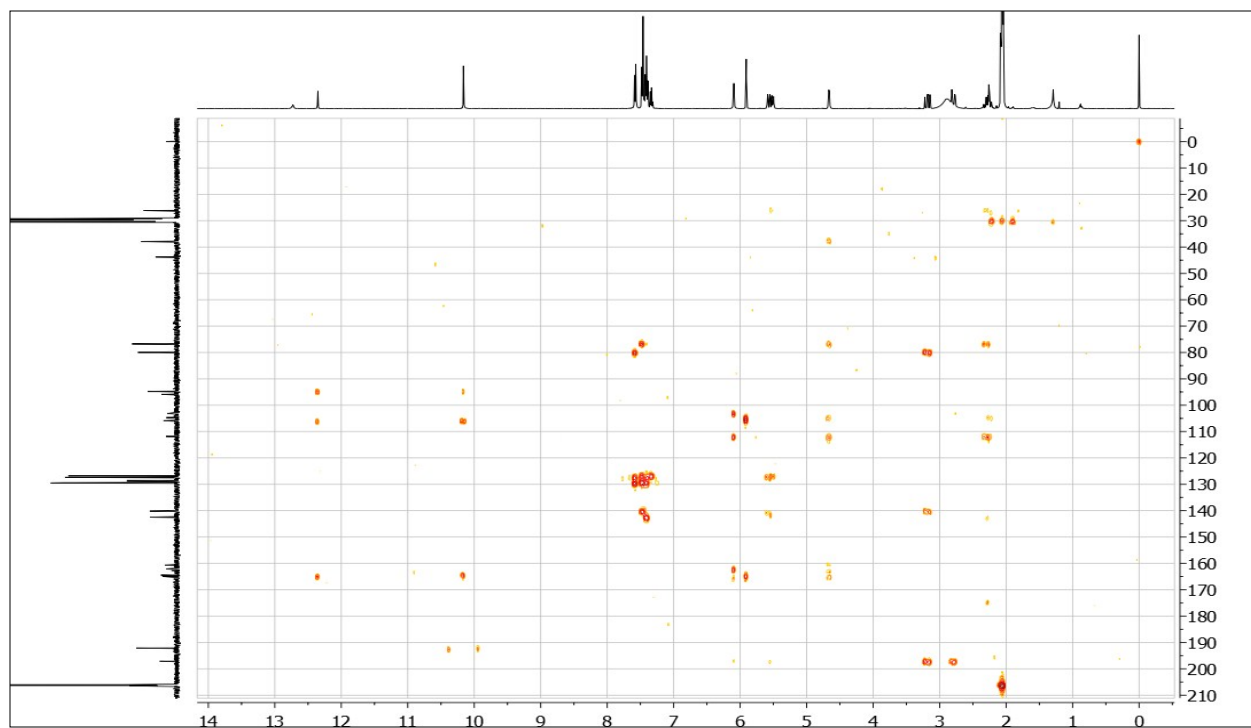

S21. HMBC NMR spectrum (acetone- $d_6$ ) of compound **3**

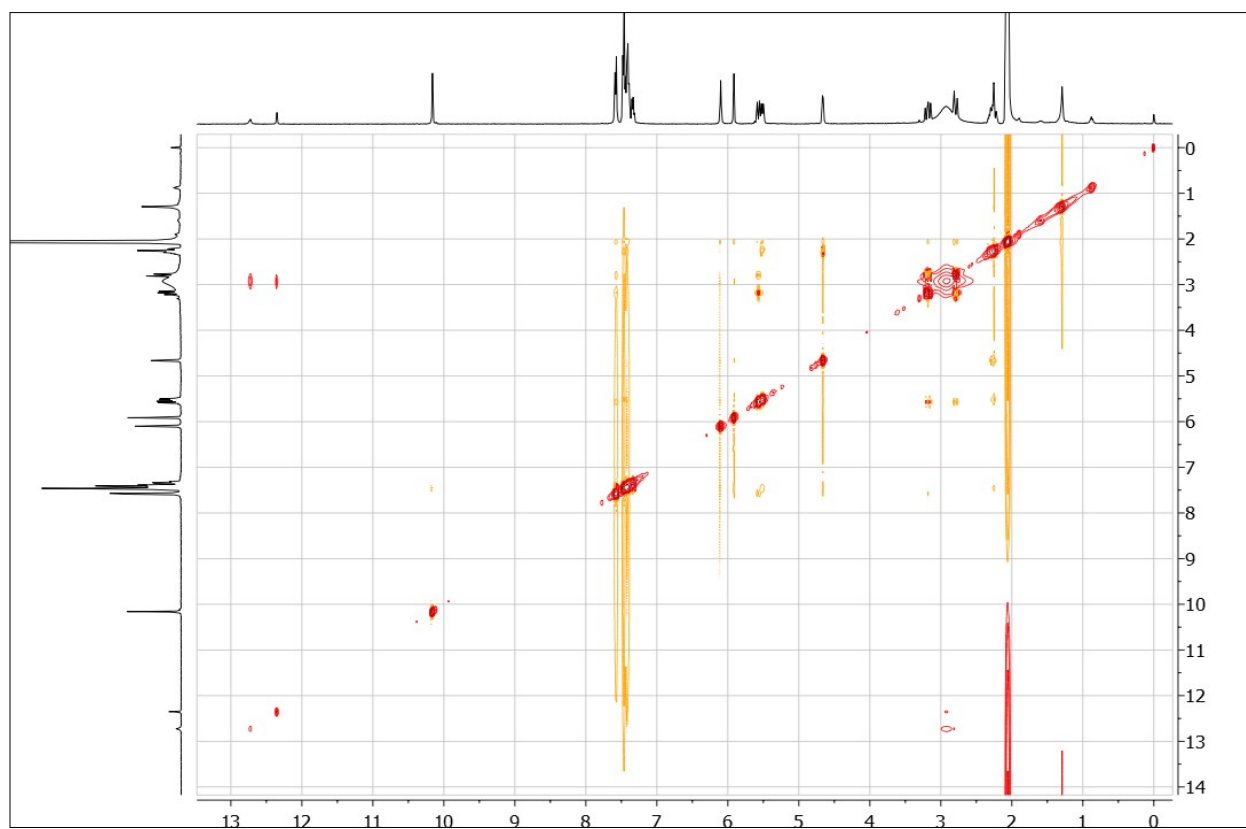

S22. NOESY spectrum (acetone- $d_6$ ) of compound **3**

Monoisotopic Mass, Even Electron Ions  
 133 formula(e) evaluated with 2 results within limits (up to 20 closest results for each mass)

Elements Used:

C: 0-40 H: 0-50 N: 0-2 O: 0-10

7EPK14G

SP SuratL 7EPK14G 57 (1.147) Cm (50:71)

1: TOF MS ES-  
 2.30e+003

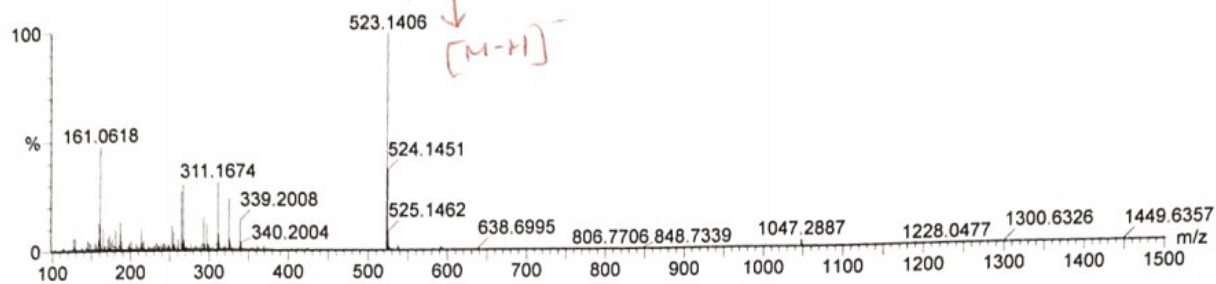

Minimum: -1.5  
 Maximum: 5.0 10.0 120.0

| Mass     | Calc. Mass | mDa  | PPM  | DBE  | i-FIT | i-FIT (Norm) | Formula       |
|----------|------------|------|------|------|-------|--------------|---------------|
| 523.1406 | 523.1393   | 1.3  | 2.5  | 20.5 | 168.7 | 0.0          | C31 H23 O8    |
|          | 523.1447   | -4.1 | -7.8 | 29.5 | 172.9 | 4.2          | C37 H19 N2 O2 |

**S23.** HRESIMS spectrum of compound **3**

**Table S1.**  $^1\text{H}$  (400 MHz) and  $^{13}\text{C}$  (100 MHz) spectroscopic data for friesodielsone A (**1**) in acetone- $d_6$ .

| Position  | Friesodielsone A ( <b>1</b> ) |                                  |                                                 |
|-----------|-------------------------------|----------------------------------|-------------------------------------------------|
|           | $\delta_{\text{C}}$           | $\delta_{\text{H}}$ ( $J$ in Hz) | HMBC ( $^1\text{H} \rightarrow ^{13}\text{C}$ ) |
| 2         | 76.7                          | 5.53 (dd, 3.5, 10.0)             | C-3, C-4, C-1', C-2', C-6'                      |
| 3         | 37.9                          | 2.24-2.33 (m)                    | C-2, C-4, C-10, C-6                             |
| 4         | 26.1                          | 4.67 (dd, 2.6, 5.4)              | C-2, C-3, C-9, C-10, C-5, C-6, C-7              |
| 5         | 162.1                         | -                                | -                                               |
| 6         | 94.9                          | 5.90 (s)                         | C-7, C-8                                        |
| 7         | 164.8                         | -                                | -                                               |
| 8         | 105.9                         | -                                | -                                               |
| 9         | 160.6                         | -                                | -                                               |
| 10        | 104.7                         | -                                | -                                               |
| 11        | 192.1                         | 10.10 (s)                        | C-6, C-7, C-8                                   |
| 1'        | 142.5                         | -                                | -                                               |
| 2',6'     | 126.8                         | 7.44-7.47 (m)                    | C-2, C-1', C-3', C-5'                           |
| 3',5'     | 129.4                         | 7.40-7.42 (m)                    | C-1', C-2', C-4', C-6'                          |
| 4'        | 128.6                         | 7.30-7.34 (m)                    | C-2', C-3', C-5', C-6'                          |
| 2''       | 79.9                          | 5.57 (dd, 3.0, 13.5)             | C-4'', C-1''', C-2''', C-6'''                   |
| 3''       | 43.7                          | 2.80 (dd, 3.0, 17.1)             | C-2'', C-4'', C-10'', C-5''                     |
|           |                               | 3.16 (dd, 13.5, 17.1)            | C-2'', C-4'', C-10'', C-5''                     |
| 4''       | 197.0                         | -                                | -                                               |
| 5''       | 163.1                         | -                                | -                                               |
| 6''       | 111.9                         | -                                | -                                               |
| 7''       | 165.2                         | -                                | -                                               |
| 8''       | 95.9                          | 6.08 (s)                         | C-6'', C-7'', C-9''                             |
| 9''       | 162.1                         | -                                | -                                               |
| 10''      | 103.1                         | -                                | -                                               |
| 1'''      | 140.2                         | -                                | -                                               |
| 2''',6''' | 127.8                         | 7.56-7.58 (m)                    | C-2''', C-1''', C-3''', C-5'''                  |
| 3''',5''' | 129.5                         | 7.43-7.47 (m)                    | C-1''', C-2''', C-4''', C-6'''                  |
| 4'''      | 129.4                         | 7.40-7.43 (m)                    | C-2''', C-3''', C-5''', C-6'                    |
| 7-OH      | -                             | 12.35 (s)                        | C-6, C-7, C-8                                   |
| 5''-OH    | -                             | 12.73 (s)                        | C-5'', C-6''                                    |

**Table S2.**  $^1\text{H}$  (400 MHz) and  $^{13}\text{C}$  (100 MHz) spectroscopic data for friesodielsone B (**2**) in acetone- $d_6$ .

| Position  | Friesodielsone B ( <b>2</b> ) |                               |                                                 |
|-----------|-------------------------------|-------------------------------|-------------------------------------------------|
|           | $\delta_{\text{C}}$           | $\delta_{\text{H}}$ (J in Hz) | HMBC ( $^1\text{H} \rightarrow ^{13}\text{C}$ ) |
| 2         | 76.7                          | 5.52 (dd, 3.0, 10.8)          | C-1', C-2', C-6'                                |
| 3         | 37.9                          | 2.25-2.30 (m)                 | C-2, C-4, C-10, C-1', C-6                       |
| 4         | 26.5                          | 4.70 (dd, 2.4, 5.6)           | C-2, C-9, C-10, C-6, C-7                        |
| 5         | 159.1                         | -                             | -                                               |
| 6         | 94.9                          | 5.91 (s)                      | C-7, C-10                                       |
| 7         | 164.9                         | -                             | -                                               |
| 8         | 106.0                         | -                             | -                                               |
| 9         | 160.8                         | -                             | -                                               |
| 10        | 105.9                         | -                             | -                                               |
| 11        | 192.1                         | 10.16 (s)                     | C-6, C-7, C-8                                   |
| 1'        | 142.3                         | -                             | -                                               |
| 2',6'     | 126.8                         | 7.45-7.47 (m)                 | C-2, C-1', C-3', C-5'                           |
| 3',5'     | 129.4                         | 7.38-7.42 (m)                 | C-1', C-2', C-4', C-6'                          |
| 4'        | 128.6                         | 7.32-7.34 (m)                 | C-2', C-3', C-5', C-6'                          |
| 2''       | 79.6                          | 5.61 (dd, 3.0, 13.0)          | C-1''', C-2''', C-6'''                          |
| 3''       | 43.6                          | 2.82 (dd, 3.0, 17.0)          | C-2'', C-4'', C-1'''                            |
|           |                               | 3.16 (dd, 13.0, 17.0)         | C-2'', C-4'', C-1'''                            |
| 4''       | 197.7                         | -                             | -                                               |
| 5''       | 160.6                         | -                             | -                                               |
| 6''       | 111.8                         | -                             | -                                               |
| 7''       | 160.6                         | -                             | -                                               |
| 8''       | 159.1                         | -                             | -                                               |
| 9''       | 164.5                         | -                             | -                                               |
| 10''      | 103.8                         | -                             | -                                               |
| 11''      | 8.32                          | 2.09 (s)                      | C-8'', C-9''                                    |
| 1'''      | 140.4                         | -                             | -                                               |
| 2''',6''' | 127.2                         | 7.60-7.61 (m)                 | C-2'', C-1''', C-3''', C-5'''                   |
| 3''',5''' | 129.5                         | 7.45-7.47 (m)                 | C-1''', C-2''', C-4''', C-6'''                  |
| 4'''      | 129.3                         | 7.38-7.42 (m)                 | C-2''', C-3''', C-5''', C-6'''                  |
| 7-OH      | -                             | 12.35 (s)                     | C-6, C-7, C-8                                   |
| 5''-OH    | -                             | 12.67 (s)                     | C-5'', C-6'', C-10''                            |



**Table 3.**  $^1\text{H}$  (400 MHz) and  $^{13}\text{C}$  (100 MHz) spectroscopic data for friesodielsone C (**3**) in acetone- $d_6$ .

| Position  | Friesodielsone C ( <b>3</b> ) |                               |                                                 |
|-----------|-------------------------------|-------------------------------|-------------------------------------------------|
|           | $\delta_{\text{C}}$           | $\delta_{\text{H}}$ (J in Hz) | HMBC ( $^1\text{H} \rightarrow ^{13}\text{C}$ ) |
| 2         | 76.7                          | 5.53 (dd, 3.2, 10.7)          | C-4, C-1', C-2', C-6'                           |
| 3         | 37.9                          | 2.25-2.32 (m)                 | C-2, C-4, C-8                                   |
| 4         | 26.1                          | 4.67 (dd, 2.6, 5.5)           | C-2, C-3, C-9, C-10, C-7, C-8, C-9              |
| 5         | 162.8                         | -                             | -                                               |
| 6         | 94.8                          | 5.90 (s)                      | C-5, C-8                                        |
| 7         | 165.2                         | -                             | -                                               |
| 8         | 105.8                         | -                             | -                                               |
| 9         | 164.7                         | -                             | -                                               |
| 10        | 104.7                         | -                             | -                                               |
| 11        | 192.1                         | 10.15(s)                      | C-6, C-8, C-9                                   |
| 1'        | 142.4                         | -                             | -                                               |
| 2',6'     | 126.8                         | 7.44-7.48 (m)                 | C-2, C-1', C-3', C-5'                           |
| 3',5'     | 129.4                         | 7.39-7.42 (m)                 | C-1', C-2', C-4', C-6'                          |
| 4'        | 128.6                         | 7.33-7.35 (m)                 | C-2', C-3', C-5', C-6'                          |
| 2''       | 79.9                          | 5.59 (dd, 3.0, 13.0)          | C-4'', C-1''', C-2''', C-6'''                   |
| 3''       | 43.7                          | 2.81 (dd, 3.0, 17.0)          | C-2'', C-4'', C-1'''                            |
|           |                               | 3.22 (dd, 13.0, 17.0)         | C-2'', C-4'', C-1'''                            |
| 4''       | 197.1                         | -                             | -                                               |
| 5''       | 162.0                         | -                             | -                                               |
| 6''       | 95.8                          | 6.08 (s)                      | C-4'', C-5'', C-7'', C-10''                     |
| 7''       | 162.8                         | -                             | -                                               |
| 8''       | 111.8                         | -                             | -                                               |
| 9''       | 160.6                         | -                             | -                                               |
| 10''      | 103.5                         | -                             | -                                               |
| 1'''      | 140.1                         | -                             | -                                               |
| 2''',6''' | 129.4                         | 7.44-7.46 (m)                 | C-2'', C-1''', C-3''', C-5'''                   |
| 3''',5''' | 129.4                         | 7.57-7.58 (m)                 | C-1''', C-2''', C-4''', C-6'''                  |
| 4'''      | 128.6                         | 7.39-7.42 (m)                 | C-2''', C-3''', C-5''', C-6'''                  |
| 7-OH      | -                             | 12.35 (s)                     | C-6, C-7, C-8                                   |
| 5''-OH    | -                             | 12.72 (s)                     | -                                               |
